# Supplementary material
Source: PubMed Central journal article supplement (PMC4806337)
Supplement: NIHMS769010-supplement-01.pdf [file NIHMS769010-supplement-01.pdf]

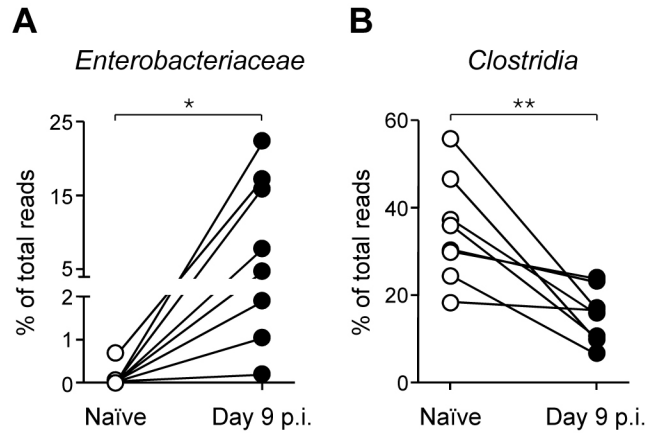

**Figure S1 (related to Figure 1). Statistical analysis of the genomic alterations observed between naïve and *T. gondii*-infected mice.** The 454 genomic analysis of fecal samples from naïve and acute *T. gondii* infected mice were found to have statistically significant increases in the proportion of *E. coli* (A) and reductions in *Clostridia* species (B). Each dot pair represents single mouse analyzed at the indicated time points (\* $P < 0.05$ , \*\* $P < 0.01$ ). All data shown are representative of two independent experiments with similar results.

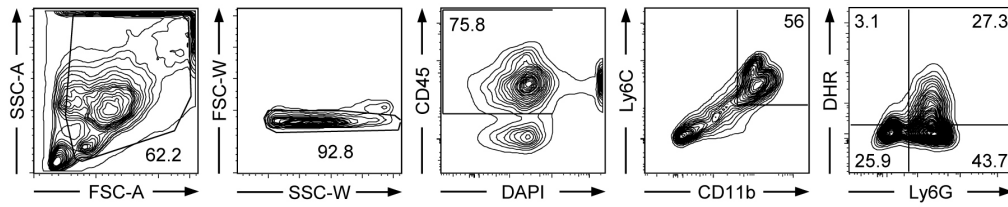

**Figure S2 (related to Figure 3). Gating strategy used to analyze the leukocytes from the lumen of *T. gondii*-infected mice by flow cytometry.**

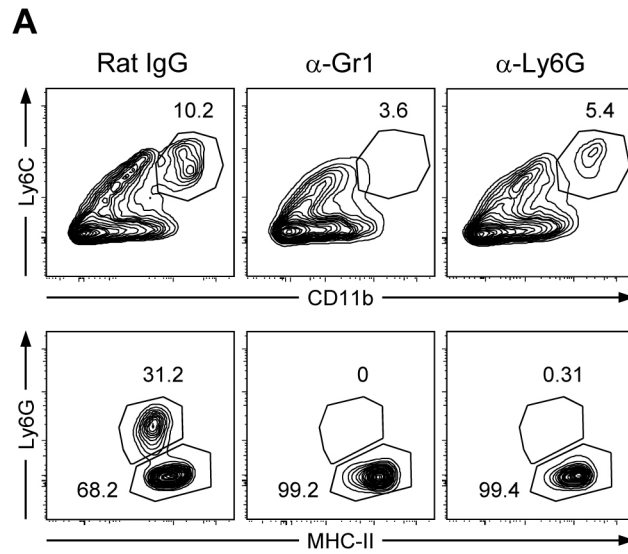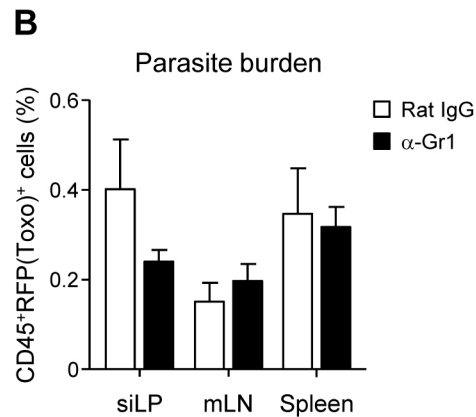

**Figure S3 (related to Figure 4). Depletion of neutrophils and inflammatory monocytes by  $\alpha$ -Gr1 and  $\alpha$ -Ly6G and effects on parasite burden. (A)** The percentage of inflammatory monocytes and neutrophils were determined in mice treated with either  $\alpha$ -Gr1 or  $\alpha$ -Ly6G. **(B)** The parasite burden of rat IgG and  $\alpha$ -Gr1 treated *T. gondii*-infected mice was determined at day 9 p.i. by analyzing the percentage of infected CD45<sup>+</sup> cells. All data shown are representative of two independent experiments with similar results. Each bar represents the mean  $\pm$  SEM of three to four mice analyzed. All data shown are representative of two independent experiments with similar results.

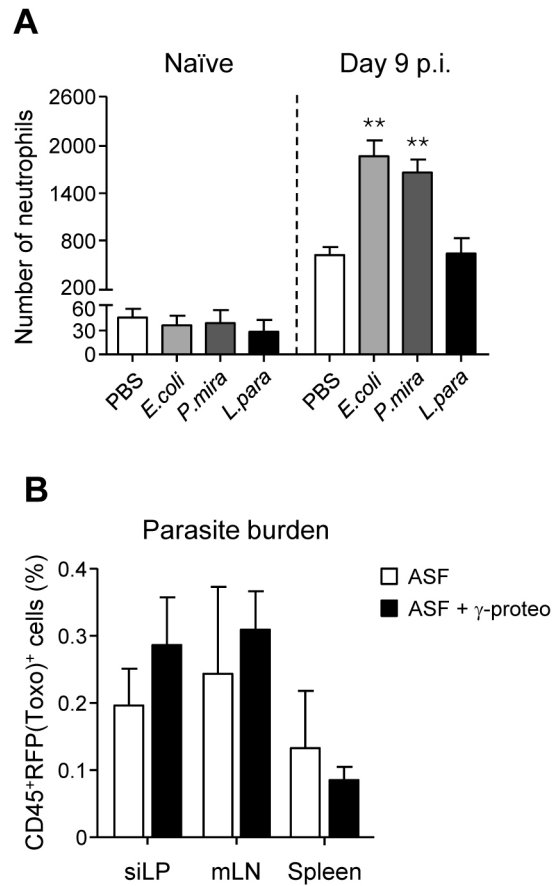

**Figure S4 (related to Figure 5). Gavage of  $\gamma$ -proteobacteria results in increased luminal recruitment of neutrophils into *T. gondii* infected mice but not in naïve mice. (A) Mice were infected with 15 *T. gondii* cysts and gavaged at day 6 p.i. with either *E. coli*, *P. mirabilis* or *L. paracasei*. Bar graphs show the number (mean  $\pm$  SEM) of luminal neutrophils isolated at day 9 p.i. (\*\* $P < 0.01$ ). (B) The parasite burden of mice colonized with ASF or ASF +  $\gamma$ -proteobacteria was determined at day 9 p.i. by analyzing the percentage of infected CD45+ cells. Each bar represents the mean  $\pm$  SEM of three to four mice analyzed. Data shown are representative of a single experiment.**

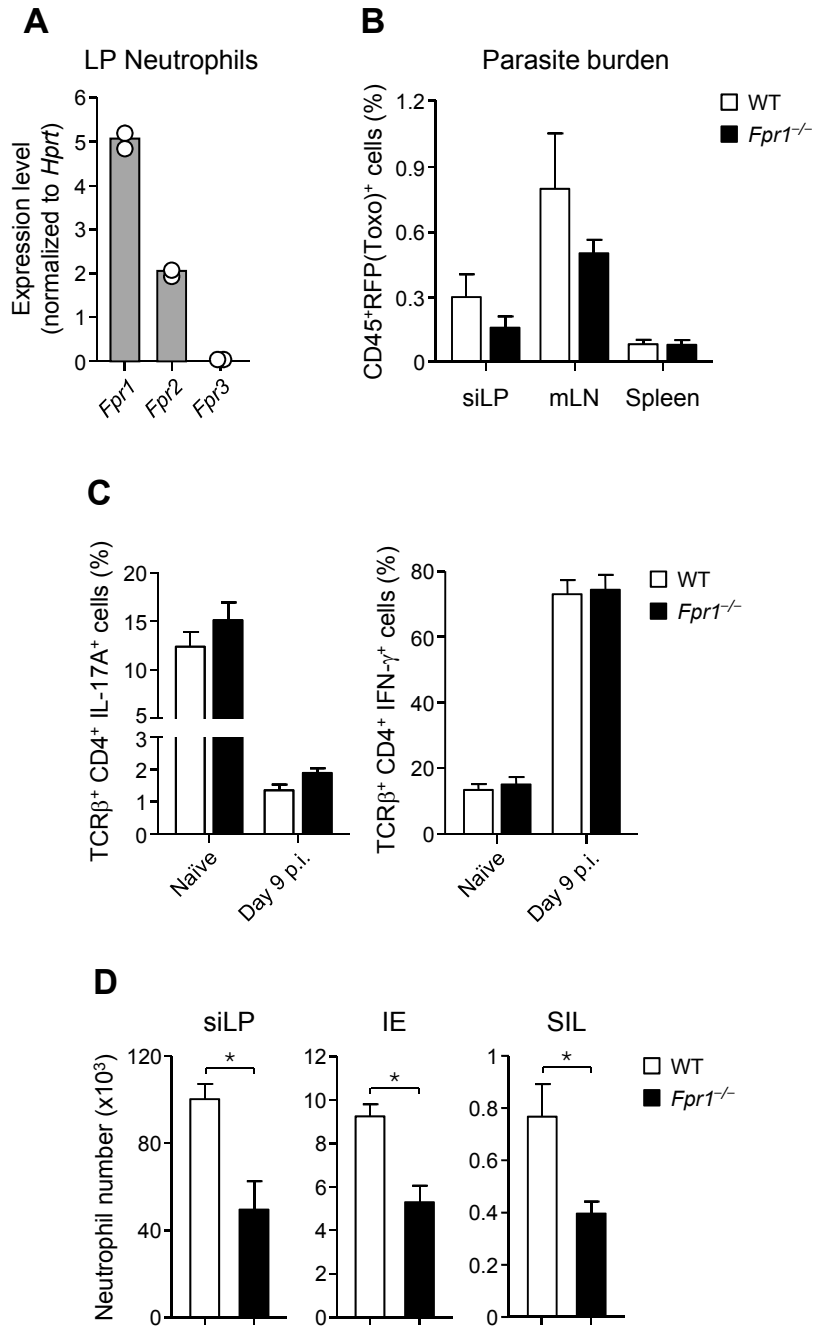

**Figure S5 (related to Figure 6). Analysis of WT and *Fpr1*<sup>-/-</sup> mice for alterations in immune function at steady state and during *T. gondii* infection. (A)** Small intestine *lamina propria* neutrophils express high levels of *Fpr1*. Neutrophils were FACS purified from the small intestine *lamina propria* of mice on day 8 after oral infection with 15 *T. gondii* cysts. Cells were resuspended in TRIzol and mRNA isolated. *Fpr1*, *Fpr2* and *Fpr3* expression levels were then analyzed by RT-PCR. Circles represent the relative expression for each sample after normalization to the housekeeping gene *Hprt* and bars the mean relative expression. (B) Parasite burden from WT and *Fpr1*<sup>-/-</sup> mice infected with *T. gondii* for 9 days. (C) Naïve and *T. gondii*-infected WT and *Fpr1*<sup>-/-</sup> mice were analyzed for differences in TCRβ<sup>+</sup>CD4<sup>+</sup> producing IFN-γ and IL-17A. (D) Total neutrophils in the siLP, IE and lumen (SIL) of WT and *Fpr1*<sup>-/-</sup> mice on day 11 p.i. Each bar represents the mean ± SEM of three to four mice analyzed (\**P*<0.05). All data shown are representative of two independent experiments with similar results.

**Table S1: Bacterial 16S rRNA gene primers used in this study.**

| <b>16S rRNA gene</b>                                           | <b>Forward Primer</b> | <b>Reverse Primer</b>   |
|----------------------------------------------------------------|-----------------------|-------------------------|
| Eubacteria (Universal)                                         | ACTCCTACGGGAGGCAGCAGT | ATTACCGCGGCTGCTGGC      |
| Enterobacteriaceae                                             | GTGCCAGCMGCCGCGGTAA   | GCCTCAAGGGCACAACCTCCAAG |
| <i>Escherichia coli</i>                                        | CATGCCGCGTGTATGAAGAA  | CGGGTAACGTCAATGAGCAAA   |
| Bacteroides                                                    | GGTTCTGAGAGGAGGTCCC   | GCTGCCTCCCGTAGGAGT      |
| <i>Eubacterium rectale/Clostridium coccooides</i> group (EREC) | ACTCCTACGGGAGGCAGC    | GCTTCTTAGTCAGGTACCGTCAT |
| Segmented Filamentous Bacteria (SFB)                           | GACGCTGAGGCATGAGAGCAT | GACGGCACGGATTGTTATTCA   |
| <i>Lactobacillus/Lactococcus</i> group                         | AGCAGTAGGGAATCTTCCA   | CACCGCTACACATGGAC       |
